# Supplementary material for: Polygenic risk for coronary artery disease in the Scottish and English population
Source: Springer Nature journal article supplement (doi:10.1186/s12872-021-02398-4), 2021-12-01
Supplement: MOESM1 [file 19938282]

## Table of Contents

|                                                                                                                                                                                                                                            |          |
|--------------------------------------------------------------------------------------------------------------------------------------------------------------------------------------------------------------------------------------------|----------|
| <b><i>Supplementary Figures</i></b> .....                                                                                                                                                                                                  | <b>2</b> |
| Supplementary Fig. 1 Filtering flow chart including qualified individuals for analysis .....                                                                                                                                               | 2        |
| Supplementary Fig. 2 Histograms showing the distribution of the Framingham score using BMI for comparison population (born in Scotland) and reference population (born in England).....                                                    | 3        |
| Supplementary Fig. 3 Histograms showing the distribution of the QRISK3 score for comparison population (born in Scotland) and reference population (born in England).....                                                                  | 3        |
| Supplementary Fig. 4 The density plot showing the distribution curves of weighted genetic risk score based on 163 CAD-associated SNPs for comparison population (born in Scotland) and reference population (born in England).....         | 4        |
| Supplementary Fig. 5 The density plot showing the distribution curves of weighted genetic risk score based on 6.6 million CAD-associated SNPs for comparison population (born in Scotland) and reference population (born in England)..... | 4        |
| Supplementary Fig. 6 Dumbbell plot showing the risk allele frequency per SNP in England and Scotland. There was no significant difference between England and Scotland in risk allele frequency among 91 variants. ....                    | 5        |
| <b><i>Supplementary Tables</i></b> .....                                                                                                                                                                                                   | <b>6</b> |
| Supplementary Table 1 Sample size with eligible genotype data and CAD prevalence in 4 countries of UK .....                                                                                                                                | 6        |
| Supplementary Table 2 Variables used when calculating the Framingham risk scores for Englander and Scottish individuals in UK Biobank at baseline.....                                                                                     | 6        |
| Supplementary Table 3 Variables used when calculating QRISK3 scores for Englander and Scottish individuals in UK Biobank at baseline .....                                                                                                 | 7        |
| Supplementary Table 4 Code list for antihypertensives in Data-Field 20003 .....                                                                                                                                                            | 8        |
| Supplementary Table 5 Codes list for identification of CAD .....                                                                                                                                                                           | 9        |
| Supplementary Table 6 Sample size with both eligible genotype data and variables for Framingham score and CAD prevalence in 4 countries of UK .....                                                                                        | 12       |
| Supplementary Table 7 Comparison of the risk allele frequencies across 163 CAD-associated SNPs between England and Scotland.....                                                                                                           | 12       |
| Supplementary Table 8 Characteristics of individuals aged 39-74 in two sub-cohorts from UK Biobank for calculating QRISK3 score.....                                                                                                       | 17       |
| Supplementary Table 9 Statistics for the Framingham score, QRISK3 score and genetic risk score in populations.....                                                                                                                         | 18       |
| Supplementary Table 10 Script written for calculating the Framingham risk score using lipids and BMI.....                                                                                                                                  | 19       |

# Supplementary Figures

Supplementary Fig. 1 Filtering flow chart including qualified individuals for analysis

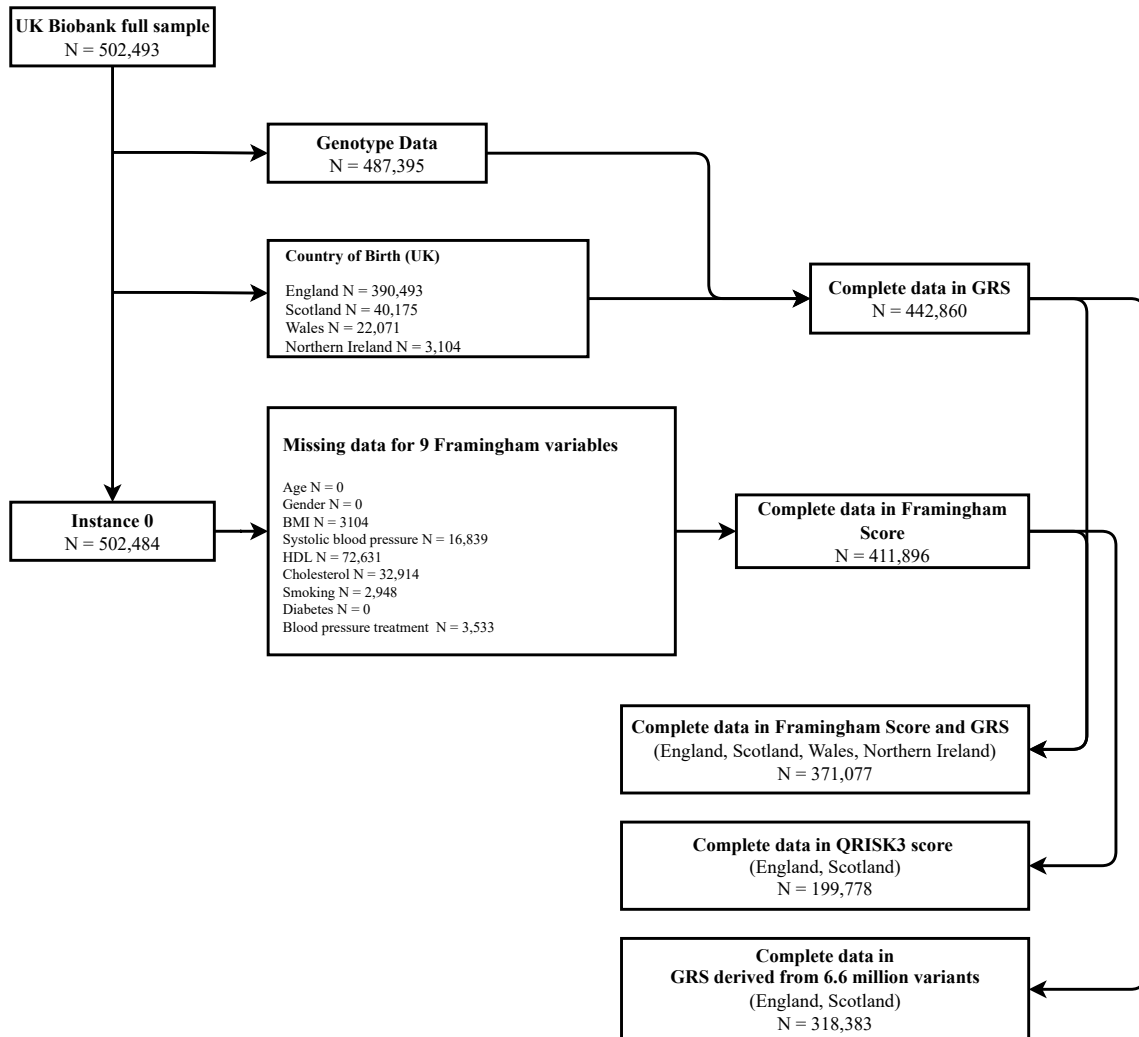

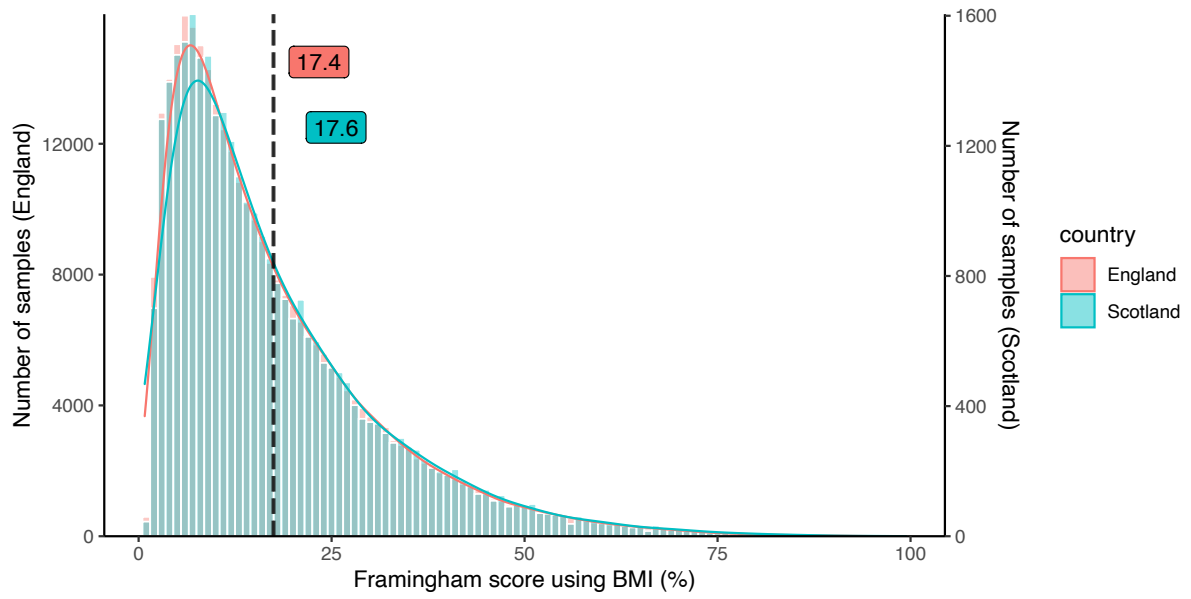

**Supplementary Fig. 2** Histograms showing the distribution of the Framingham score using BMI for comparison population (born in Scotland) and reference population (born in England).

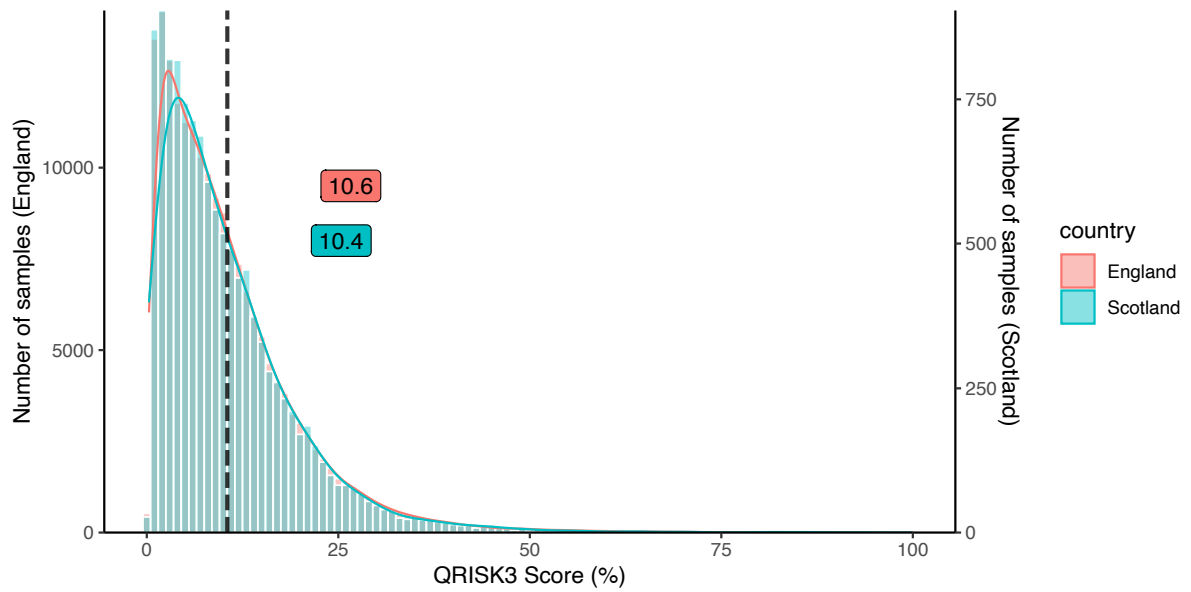

**Supplementary Fig. 3** Histograms showing the distribution of the QRISK3 score for comparison population (born in Scotland) and reference population (born in England).

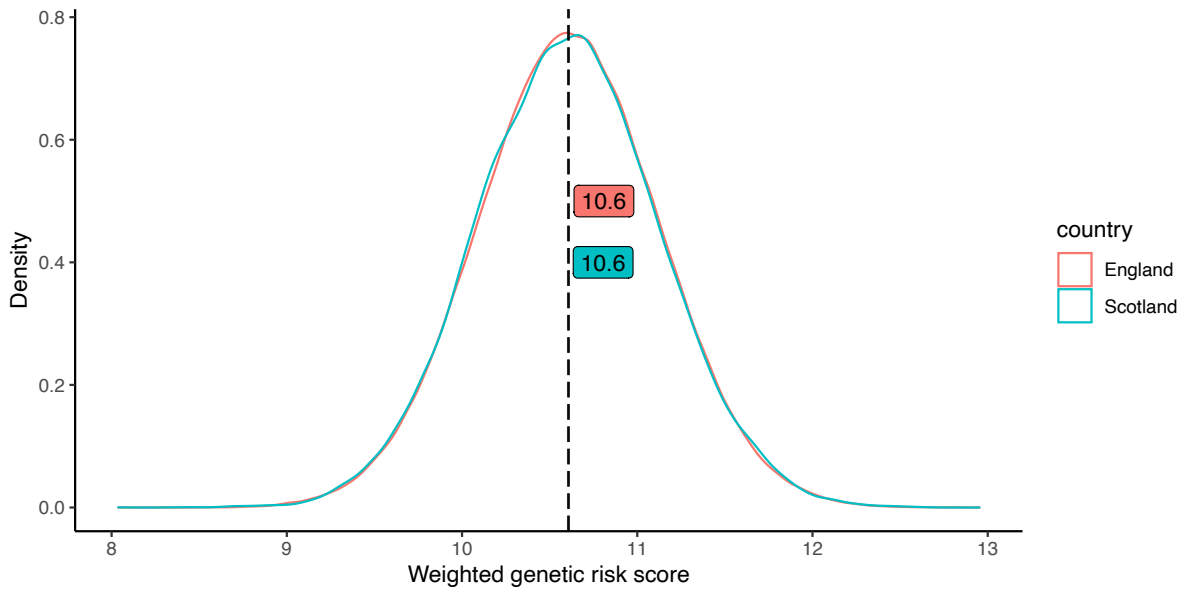

**Supplementary Fig. 4** The density plot showing the distribution curves of weighted genetic risk score based on 163 CAD-associated SNPs for comparison population (born in Scotland) and reference population (born in England).

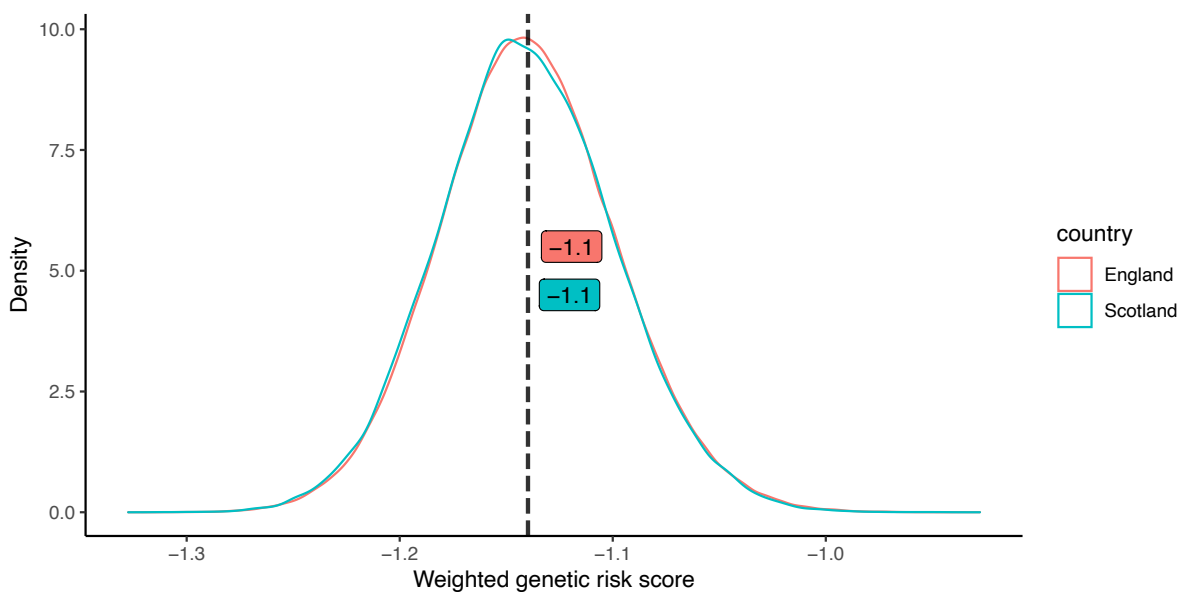

**Supplementary Fig. 5** The density plot showing the distribution curves of weighted genetic risk score based on 6.6 million CAD-associated SNPs for comparison population (born in Scotland) and reference population (born in England).

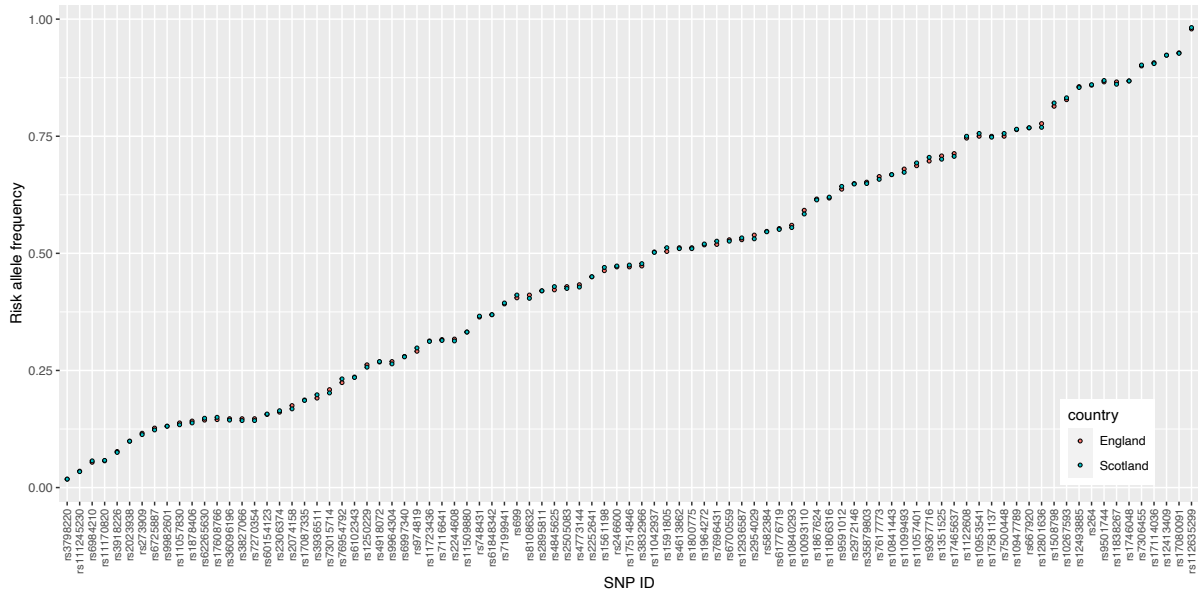

**Supplementary Fig. 6** Dumbbell plot showing the risk allele frequency per SNP in England and Scotland. There was no significant difference between England and Scotland in risk allele frequency among 91 variants.

## Supplementary Tables

**Supplementary Table 1** Sample size with eligible genotype data and CAD prevalence in 4 countries of UK

| Country of Birth    | #Samples | CAD Prevalence (%) | P (Chi-squared test) |
|---------------------|----------|--------------------|----------------------|
| Scotland ***        | 39,130   | 9.06               | <0.001               |
| Wales **            | 21,567   | 8.27               | 0.004                |
| Northern Ireland    | 2,990    | 8.06               | 0.506                |
| England (reference) | 379,173  | 7.73               | /                    |
|                     | 442,860  | S>W>NI>E           | /                    |

\* p < 0.05; \*\* p < 0.01; \*\*\* p < 0.001

**Supplementary Table 2** Variables used when calculating the Framingham risk scores for Englander and Scottish individuals in UK Biobank at baseline

| Variable included in Framingham risk score | Measured by                                  | UKBB Field ID       | ICD Code |
|--------------------------------------------|----------------------------------------------|---------------------|----------|
| <b>Biological Factors</b>                  |                                              |                     |          |
| Age                                        | Baseline characteristic                      | 21003               |          |
| Gender                                     | Baseline characteristic                      | 31                  |          |
| Systolic blood pressure                    | Baseline characteristic                      | 4080, 93            |          |
| HDL                                        | Baseline characteristic                      | 30760               |          |
| Cholesterol                                | Baseline characteristic                      | 30690               |          |
| <b>Lifestyle</b>                           |                                              |                     |          |
| BMI                                        | Baseline characteristic                      | 21001               |          |
| Smoking                                    | Self-report                                  | 20116               |          |
| <b>Diagnoses</b>                           |                                              |                     |          |
| Diabetes                                   | Hospital episode statistics                  | 41270, 41202, 41204 | E10-E14  |
| <b>Treatments</b>                          |                                              |                     |          |
| Antihypertensives                          | Nurses interview treatment data/ self-report | 20003, 6177, 6153   |          |

**Supplementary Table 3** Variables used when calculating QRISK3 scores for England and Scottish individuals in UK Biobank at baseline

| <b>Variable included in QRISK3 algorithm</b> | <b>UKBB Field ID</b> | <b>ICD Code</b>         |
|----------------------------------------------|----------------------|-------------------------|
| <b>Biological Factors</b>                    |                      |                         |
| Age                                          | 21003                |                         |
| Systolic blood pressure                      | 4080                 |                         |
| Systolic blood pressure variability          | 4080                 |                         |
| Total cholesterol: HDL ratio                 | 30690, 30760         |                         |
| CVD in first degree relative (<60 years)     | 20107, 20110, 20111  |                         |
| <b>Lifestyle</b>                             |                      |                         |
| Ethnicity                                    | 21000                |                         |
| Townsend deprivation index                   | 189                  |                         |
| BMI                                          | 21001                |                         |
| Smoking                                      | 3456, 20116          |                         |
| <b>Diagnoses</b>                             |                      |                         |
| Arthritis                                    | 41270                | M05                     |
| Type I Diabetes                              | 41270                | E10                     |
| Type II Diabetes                             | 41270                | E11-E14                 |
| Systemic lupus erythematosus                 | 41270                | M32.9                   |
| Atrial fibrillation                          | 41270                | I48                     |
| Chronic kidney disease                       | 41270                | N18.3-N18.5             |
| Migraine                                     | 41270                | G43                     |
| Severe mental illness                        | 41270                | F20, F23, F31, F32, F33 |
| Erectile dysfunction                         | 41270                | N52                     |
| <b>Treatments</b>                            |                      |                         |
| Antihypertensives                            | 20003                |                         |
| Corticosteroids                              | 20003                |                         |
| Second generation atypical Psychotics        | 20003                |                         |
| Erectile dysfunction                         | 20003                |                         |

**Supplementary Table 4** Code list for antihypertensives in Data-Field 20003

| Data Field 20003  | Code                                        |
|-------------------|---------------------------------------------|
| Antihypertensives | 1140860332 1140860334 1140860336 1140860338 |
|                   | 1140860340 1140860342 1140860348 1140860352 |
|                   | 1140860356 1140860358 1140860362 1140860380 |
|                   | 1140860382 1140860386 1140860390 1140860394 |
|                   | 1140860396 1140860398 1140860402 1140860404 |
|                   | 1140860406 1140860410 1140860418 1140860422 |
|                   | 1140860426 1140860434 1140860454 1140860470 |
|                   | 1140860478 1140860492 1140860498 1140860520 |
|                   | 1140860532 1140860534 1140860544 1140860552 |
|                   | 1140860558 1140860562 1140860564 1140860580 |
|                   | 1140860590 1140860610 1140860628 1140860632 |
|                   | 1140860638 1140860654 1140860658 1140860690 |
|                   | 1140860696 1140860706 1140860714 1140860728 |
|                   | 1140860736 1140860738 1140860750 1140860752 |
|                   | 1140860758 1140860764 1140860776 1140860784 |
|                   | 1140860790 1140860802 1140860806 1140860828 |
|                   | 1140860830 1140860834 1140860836 1140860838 |
|                   | 1140860840 1140860842 1140860846 1140860848 |
|                   | 1140860862 1140860878 1140860882 1140860892 |
|                   | 1140860904 1140860912 1140860918 1140860938 |
|                   | 1140860942 1140860952 1140860954 1140860966 |
|                   | 1140860972 1140860976 1140860982 1140860988 |
|                   | 1140860994 1140861000 1140861002 1140861008 |
|                   | 1140861010 1140861016 1140861022 1140861024 |
|                   | 1140861034 1140861046 1140861068 1140861070 |
|                   | 1140861088 1140861090 1140861106 1140861110 |
|                   | 1140861114 1140861120 1140861128 1140861130 |
|                   | 1140861136 1140861138 1140861166 1140861176 |
|                   | 1140861190 1140861194 1140861202 1140861266 |
|                   | 1140861268 1140861276 1140861282 1140861326 |
|                   | 1140861384 1140864950 1140864952 1140866072 |
|                   | 1140866074 1140866078 1140866084 1140866086 |
|                   | 1140866090 1140866092 1140866094 1140866096 |
|                   | 1140866102 1140866104 1140866108 1140866110 |
|                   | 1140866116 1140866122 1140866128 1140866132 |
|                   | 1140866136 1140866138 1140866140 1140866144 |
|                   | 1140866146 1140866156 1140866158 1140866162 |
|                   | 1140866164 1140866168 1140866182 1140866192 |
|                   | 1140866194 1140866200 1140866202 1140866206 |
|                   | 1140866210 1140866212 1140866220 1140866222 |
|                   | 1140866226 1140866230 1140866232 1140866236 |
|                   | 1140866244 1140866248 1140866262 1140866280 |
|                   | 1140866282 1140866306 1140866308 1140866312 |
|                   | 1140866318 1140866324 1140866328 1140866330 |
|                   | 1140866332 1140866334 1140866340 1140866352 |
|                   | 1140866354 1140866356 1140866360 1140866388 |
|                   | 1140866390 1140866396 1140866400 1140866402 |
|                   | 1140866404 1140866406 1140866408 1140866410 |
|                   | 1140866412 1140866416 1140866418 1140866420 |
|                   | 1140866422 1140866426 1140866438 1140866440 |
|                   | 1140866442 1140866444 1140866446 1140866448 |
|                   | 1140866450 1140866460 1140866466 1140866484 |
|                   | 1140866506 1140866546 1140866554 1140866692 |
|                   | 1140866704 1140866712 1140866724 1140866726 |
|                   | 1140866738 1140866756 1140866758 1140866764 |
|                   | 1140866766 1140866778 1140866782 1140866784 |
|                   | 1140866798 1140866800 1140866802 1140866804 |



|  |                                                                                                                                                                                                                                                                                                                                                                                                                                                                                                                                                                                                                                                                                                                                                                                                                                                                                                                                                                                                                                                                                                                       |
|--|-----------------------------------------------------------------------------------------------------------------------------------------------------------------------------------------------------------------------------------------------------------------------------------------------------------------------------------------------------------------------------------------------------------------------------------------------------------------------------------------------------------------------------------------------------------------------------------------------------------------------------------------------------------------------------------------------------------------------------------------------------------------------------------------------------------------------------------------------------------------------------------------------------------------------------------------------------------------------------------------------------------------------------------------------------------------------------------------------------------------------|
|  | 1140875808 1140879758 1140879760 1140879762<br>1140879778 1140879782 1140879786 1140879794<br>1140879798 1140879802 1140879806 1140879810<br>1140879818 1140879822 1140879824 1140879826<br>1140879830 1140879834 1140879842 1140879854<br>1140879866 1140888510 1140888512 1140888552<br>1140888556 1140888560 1140888578 1140888582<br>1140888586 1140888646 1140888686 1140888760<br>1140888762 1140909368 1140911698 1140916356<br>1140916362 1140917428 1140923572 1140923712<br>1140923718 1140926778 1140926780 1141145658<br>1141145660 1141145668 1141151016 1141151018<br>1141151382 1141152600 1141152998 1141153006<br>1141153026 1141153032 1141153328 1141156754<br>1141156808 1141156836 1141156846 1141157252<br>1141157254 1141164148 1141164154 1141164276<br>1141164280 1141165470 1141165476 1141166006<br>1141167822 1141167832 1141171152 1141171336<br>1141171344 1141172682 1141172686 1141172698<br>1141173888 1141180592 1141180598 1141187788<br>1141187790 1141190160 1141192064 1141193282<br>1141193346 1141194794 1141194800 1141194804<br>1141194808 1141194810 1141201038 1141201040 |
|--|-----------------------------------------------------------------------------------------------------------------------------------------------------------------------------------------------------------------------------------------------------------------------------------------------------------------------------------------------------------------------------------------------------------------------------------------------------------------------------------------------------------------------------------------------------------------------------------------------------------------------------------------------------------------------------------------------------------------------------------------------------------------------------------------------------------------------------------------------------------------------------------------------------------------------------------------------------------------------------------------------------------------------------------------------------------------------------------------------------------------------|

**Supplementary Table 5** Codes list for identification of CAD

| <b>Hospital codes</b>                                                                                                             |
|-----------------------------------------------------------------------------------------------------------------------------------|
| <b>ICD10 I21-I24,I25.2</b>                                                                                                        |
| I21 I21 Acute myocardial infarction                                                                                               |
| I210 I21.0 Acute transmural myocardial infarction of anterior wall                                                                |
| I211 I21.1 Acute transmural myocardial infarction of inferior wall                                                                |
| I212 I21.2 Acute transmural myocardial infarction of other sites                                                                  |
| I213 I21.3 Acute transmural myocardial infarction of unspecified site                                                             |
| I214 I21.4 Acute subendocardial myocardial infarction                                                                             |
| I219 I21.9 Acute myocardial infarction, unspecified                                                                               |
| I21X I21.X Presumed acute myocardial infarction (unconfirmed)                                                                     |
| I22 I22 Subsequent myocardial infarction                                                                                          |
| I220 I22.0 Subsequent myocardial infarction of anterior wall                                                                      |
| I221 I22.1 Subsequent myocardial infarction of inferior wall                                                                      |
| I228 I22.8 Subsequent myocardial infarction of other sites                                                                        |
| I229 I22.9 Subsequent myocardial infarction of unspecified site                                                                   |
| I23 I23 Certain current complications following acute myocardial infarction                                                       |
| I23.0 Haemopericardium as current complication following acute myocardial I230 infarction                                         |
| I23.1 Atrial septal defect as current complication following acute myocardial I231 infarction                                     |
| I23.2 Ventricular septal defect as current complication following acute myocardial I232 infarction                                |
| I23.3 Rupture of cardiac wall without haemopericardium as current complication I233 following acute myocardial infarction         |
| I23.4 Rupture of chordae tendinae as current complication following acute I234 myocardial infarction                              |
| I23.5 Rupture of papillary muscle as current complication following acute myocardial I235 infarction                              |
| I23.6 Thrombosis of atrium, auricular appendage and ventricle as current I236 complications following acute myocardial infarction |
| I238 I23.8 Other current complications following acute myocardial infarction                                                      |

|                                                                                |
|--------------------------------------------------------------------------------|
| I24 I24 Other acute ischaemic heart diseases                                   |
| I240 I24.0 Coronary thrombosis not resulting in myocardial infarction          |
| I241 I24.1 Dressler's syndrome                                                 |
| I248 I24.8 Other forms of acute ischaemic heart disease                        |
| I249 I24.9 Acute ischaemic heart disease, unspecified                          |
| I252 I25.2 Old myocardial infarction                                           |
| <b>ICD9 410-412</b>                                                            |
| 410 410 Acute myocardial infarction                                            |
| 4109 4109 Acute myocardial infarction                                          |
| 411 411 Other acute and subacute forms of ischaemic heart disease              |
| 4119 4119 Other acute and subacute forms of ischaemic heart disease            |
| 412 412 Old myocardial infarction                                              |
| 4129 4129 Old myocardial infarction                                            |
| <b>OPCS -4 K40- K46, K49, K50.1, K75</b>                                       |
| K40 K40 Saphenous vein graft replacement of coronary artery                    |
| K401 K40.1 Saphenous vein graft replacement of one coronary artery             |
| K402 K40.2 Saphenous vein graft replacement of two coronary arteries           |
| K403 K40.3 Saphenous vein graft replacement of three coronary arteries         |
| K404 K40.4 Saphenous vein graft replacement of four or more coronary arteries  |
| K408 K40.8 Other specified saphenous vein graft replacement of coronary artery |
| K409 K40.9 Unspecified saphenous vein graft replacement of coronary artery     |
| K41 K41 Other autograft replacement of coronary artery                         |
| K411 K41.1 Autograft replacement of one coronary artery NEC                    |
| K412 K41.2 Autograft replacement of two coronary arteries NEC                  |
| K413 K41.3 Autograft replacement of three coronary arteries NEC                |
| K414 K41.4 Autograft replacement of four or more coronary arteries NEC         |
| K418 K41.8 Other specified other autograft replacement of coronary artery      |
| K419 K41.9 Unspecified other autograft replacement of coronary artery          |
| K42 K42 Allograft replacement of coronary artery                               |
| K421 K42.1 Allograft replacement of one coronary artery                        |
| K422 K42.2 Allograft replacement of two coronary arteries                      |
| K423 K42.3 Allograft replacement of three coronary arteries                    |
| K424 K42.4 Allograft replacement of four or more coronary arteries             |
| K428 K42.8 Other specified allograft replacement of coronary artery            |
| K429 K42.9 Unspecified allograft replacement of coronary artery                |
| K43 K43 Prosthetic replacement of coronary artery                              |
| K431 K43.1 Prosthetic replacement of one coronary artery                       |
| K432 K43.2 Prosthetic replacement of two coronary arteries                     |
| K433 K43.3 Prosthetic replacement of three coronary arteries                   |
| K434 K43.4 Prosthetic replacement of four or more coronary arteries            |
| K438 K43.8 Other specified prosthetic replacement of coronary artery           |
| K439 K43.9 Unspecified prosthetic replacement of coronary artery               |
| K44 K44 Other replacement of coronary artery                                   |
| K441 K44.1 Replacement of coronary arteries using multiple methods             |
| K442 K44.2 Revision of replacement of coronary artery                          |
| K448 K44.8 Other specified other replacement of coronary artery                |
| K449 K44.9 Unspecified other replacement of coronary artery                    |
| K45 K45 Connection of thoracic artery to coronary artery                       |

|                                                                                                                              |
|------------------------------------------------------------------------------------------------------------------------------|
| K451 K45.1 Double anastomosis of mammary arteries to coronary arteries                                                       |
| K452 K45.2 Double anastomosis of thoracic arteries to coronary arteries NEC                                                  |
| K453 K45.3 Anastomosis of mammary artery to left anterior descending coronary artery                                         |
| K454 K45.4 Anastomosis of mammary artery to coronary artery NEC                                                              |
| K455 K45.5 Anastomosis of thoracic artery to coronary artery NEC                                                             |
| K456 K45.6 Revision of connection of thoracic artery to coronary artery                                                      |
| K458 K45.8 Other specified connection of thoracic artery to coronary artery                                                  |
| K459 K45.9 Unspecified connection of thoracic artery to coronary artery                                                      |
| K46 K46 Other bypass of coronary artery                                                                                      |
| K461 K46.1 Double implantation of mammary arteries into heart                                                                |
| K462 K46.2 Double implantation of thoracic arteries into heart NEC                                                           |
| K463 K46.3 Implantation of mammary artery into heart NEC                                                                     |
| K464 K46.4 Implantation of thoracic artery into heart NEC                                                                    |
| K465 K46.5 Revision of implantation of thoracic artery into heart                                                            |
| K468 K46.8 Other specified other bypass of coronary artery                                                                   |
| K469 K46.9 Unspecified other bypass of coronary artery                                                                       |
| K49 K49 Transluminal balloon angioplasty of coronary artery                                                                  |
| K491 K49.1 Percutaneous transluminal balloon angioplasty of one coronary artery                                              |
| K492 K49.2 Percutaneous transluminal balloon angioplasty of multiple coronary arteries                                       |
| K49.3 Percutaneous transluminal balloon angioplasty of bypass graft of coronary K493 artery                                  |
| K494 K49.4 Percutaneous transluminal cutting balloon angioplasty of coronary artery                                          |
| K498 K49.8 Other specified transluminal balloon angioplasty of coronary artery                                               |
| K499 K49.9 Unspecified transluminal balloon angioplasty of coronary artery                                                   |
| K50 K50 Other therapeutic transluminal operations on coronary artery                                                         |
| K501 K50.1 Percutaneous transluminal laser coronary angioplasty                                                              |
| K502 K50.2 Percutaneous transluminal coronary thrombolysis using streptokinase                                               |
| K50.3 Percutaneous transluminal injection of therapeutic substance into coronary K503 artery NEC                             |
| K504 K50.4 Percutaneous transluminal atherectomy of coronary artery                                                          |
| K508 K50.8 Other specified other therapeutic transluminal operations on coronary artery                                      |
| K509 K50.9 Unspecified other therapeutic transluminal operations on coronary artery                                          |
| K75 Percutaneous transluminal balloon angioplasty and insertion of stent into K75 coronary artery                            |
| K75.1 Percutaneous transluminal balloon angioplasty and insertion of 1-2 drug- K751 eluting stents into coronary artery      |
| K75.2 Percutaneous transluminal balloon angioplasty and insertion of 3 or more K752 drug-eluting stents into coronary artery |
| K75.3 Percutaneous transluminal balloon angioplasty and insertion of 1-2 stents K753 into coronary artery                    |
| K75.4 Percutaneous transluminal balloon angioplasty and insertion of 3 or more K754 stents into coronary artery NEC          |
| K75.8 Other specified percutaneous transluminal balloon angioplasty and insertion K758 of stent into coronary artery         |
| K75.9 Unspecified percutaneous transluminal balloon angioplasty and insertion of K759 stent into coronary artery             |
| <b>2. Self-reported</b>                                                                                                      |
| 1075 heart attack/myocardial infarction                                                                                      |
| 1070 coronary angioplasty (ptca) +/- stent                                                                                   |
| 1095 coronary artery bypass grafts (cabg)                                                                                    |
| 1523 triple heart bypass                                                                                                     |

**Supplementary Table 6** Sample size with both eligible genotype data and variables for Framingham score and CAD prevalence in 4 countries of UK

| Country of Birth    | #Samples | CAD Prevalence (%) | P (Chi-squared test) |
|---------------------|----------|--------------------|----------------------|
| Scotland ***        | 31,963   | 8.98               | <0.001               |
| Wales**             | 18,724   | 8.30               | 0.002                |
| Northern Ireland    | 2,501    | 8.36               | 0.205                |
| England (reference) | 317,889  | 7.68               | /                    |
|                     | 371,077  | S>NI>W>E           | /                    |

\* p < 0.05; \*\* p < 0.01; \*\*\* p < 0.001

**Supplementary Table 7** Comparison of the risk allele frequencies across 163 CAD-associated SNPs between England and Scotland

| Position         | SNP        | Risk allele | OR   | England RAF | Scotland RAF | Delta RAF | P (Chi-squared) | Gene(s) at locus                            |
|------------------|------------|-------------|------|-------------|--------------|-----------|-----------------|---------------------------------------------|
| chr1:38,461,319  | rs61776719 | A           | 1.04 | 0.553       | 0.551        | -0.002    | 1.00E+00        | FHL3, UTP11, SF3A3, MANEAL, INPP5B          |
| chr1:55,496,039  | rs11206510 | T           | 1.08 | 0.811       | 0.819        | 0.008     | 1.53E-04        | PCSK9                                       |
| chr1:56,962,821  | rs17114036 | A           | 1.17 | 0.907       | 0.905        | -0.002    | 1.00E+00        | PPAP2B                                      |
| chr1:109,822,166 | rs599839   | A           | 1.11 | 0.77        | 0.759        | -0.011    | 2.35E-08        | SORT1, PSCR1, CELSR2                        |
| chr1:115,753,482 | rs11806316 | G           | 1.04 | 0.618       | 0.62         | 0.002     | 1.00E+00        | NGF, CASQ2                                  |
| chr1:151,762,308 | rs11810571 | G           | 1.07 | 0.842       | 0.828        | -0.014    | 7.44E-17        | TDRKH, RP11-98D18.9                         |
| chr1:200,646,073 | rs6700559  | C           | 1.04 | 0.529       | 0.526        | -0.003    | 1.00E+00        | DDX59, CAMSAP2, KIF14                       |
| chr1:222,823,529 | rs17465637 | C           | 1.14 | 0.713       | 0.707        | -0.007    | 7.37E-02        | MIA3, AIDA, C1orf58                         |
| chr2:21,286,057  | rs515135   | C           | 1.07 | 0.817       | 0.827        | 0.01      | 1.66E-08        | APOB                                        |
| chr2:45,896,437  | rs582384   | A           | 1.03 | 0.547       | 0.546        | -0.001    | 1.00E+00        | PRKCE, TMEM247                              |
| chr2:164,957,251 | rs12999907 | A           | 1.06 | 0.825       | 0.817        | -0.008    | 2.32E-04        | FIGN                                        |
| chr2:188,196,469 | rs840616   | C           | 1.04 | 0.66        | 0.672        | 0.013     | 1.39E-08        | CALCRL, TFPI                                |
| chr2:227,100,698 | rs2972146  | T           | 1.07 | 0.649       | 0.648        | -0.001    | 1.00E+00        | LOC646736, IRS1, MIR5702                    |
| chr2:238,223,955 | rs11677932 | G           | 1.03 | 0.68        | 0.697        | 0.017     | 6.89E-16        | COL6A3                                      |
| chr3:48,193,515  | rs7617773  | T           | 1.04 | 0.664       | 0.658        | -0.005    | 1.00E+00        | CDC25A, SPINK8, MAP4, ZNF589                |
| chr3:49,448,566  | rs7623687  | A           | 1.07 | 0.859       | 0.849        | -0.01     | 4.55E-09        | RHOA, AMT, TCTA, CDHRA, KLHDC8B, and others |
| chr3:132,257,961 | rs10512861 | G           | 1.04 | 0.868       | 0.861        | -0.007    | 4.67E-05        | DNAJC13, NPHP3, ACAD11, UBA5                |
| chr3:136,069,472 | rs667920   | T           | 1.05 | 0.768       | 0.768        | 0.001     | 1.00E+00        | STAG1, MSL2, NCK1, PPP2R3A                  |
| chr3:153,839,866 | rs12493885 | C           | 1.07 | 0.856       | 0.854        | -0.002    | 1.00E+00        | ARHGEF26                                    |
| chr4:82,587,050  | rs11099493 | A           | 1.04 | 0.68        | 0.673        | -0.008    | 1.16E-02        | HNRNPD, RASGEF1B                            |
| chr4:146,782,837 | rs35879803 | C           | 1.05 | 0.652       | 0.649        | -0.003    | 1.00E+00        | ZNF827                                      |
| chr4:156,635,309 | rs7692387  | G           | 1.08 | 0.817       | 0.809        | -0.008    | 1.19E-04        | GUCY1A1*                                    |
| chr4:169,687,725 | rs7696431  | T           | 1.04 | 0.519       | 0.526        | 0.007     | 1.99E-01        | PALLD, DDX60L                               |
| chr5:9,556,694   | rs1508798  | T           | 1.05 | 0.814       | 0.821        | 0.007     | 1.05E-03        | SEMA5A, TAS2R1                              |
| chr6:1,617,143   | rs9501744  | C           | 1.05 | 0.866       | 0.869        | 0.003     | 1.00E+00        | FOXC1                                       |
| chr6:12,927,544  | rs12526453 | C           | 1.1  | 0.668       | 0.681        | 0.013     | 8.32E-09        | PHACTR1, EDN1                               |
| chr6:31,888,367  | rs3130683  | T           | 1.09 | 0.856       | 0.839        | -0.018    | 1.08E-31        | C2, C4A, and others                         |

|                   |             |   |      |       |       |        |          |                                       |
|-------------------|-------------|---|------|-------|-------|--------|----------|---------------------------------------|
| chr6:35,034,800   | rs17609940  | G | 1.07 | 0.784 | 0.765 | -0.019 | 7.53E-27 | ANKS1A, UHRF1BP1                      |
| chr6:39,174,922   | rs10947789  | T | 1.07 | 0.764 | 0.765 | 0      | 1.00E+00 | KCNK5                                 |
| chr6:43,758,873   | rs6905288   | A | 1.05 | 0.567 | 0.584 | 0.017  | 2.20E-14 | VEGFA, MRPL14, TMEM63B                |
| chr6:57,160,572   | rs9367716   | G | 1.04 | 0.697 | 0.705 | 0.008  | 4.27E-03 | PRIM2, RAB23, DST, BEND6              |
| chr6:82,612,271   | rs4613862   | A | 1.03 | 0.512 | 0.51  | -0.002 | 1.00E+00 | FAM46A                                |
| chr6:134,214,525  | rs12190287  | C | 1.08 | 0.629 | 0.619 | -0.01  | 4.90E-05 | TCF21, TARID (EYA4,aiAS1)             |
| chr6:150,997,401  | rs17080091  | C | 1.05 | 0.928 | 0.927 | -0.001 | 1.00E+00 | PLEKHG1, IYD                          |
| chr6:161,143,608  | rs4252120   | T | 1.07 | 0.708 | 0.722 | 0.014  | 2.99E-12 | PLG, LPAL2                            |
| chr7:1,937,261    | rs10267593  | G | 1.04 | 0.828 | 0.832 | 0.004  | 1.00E+00 | MAD1L1                                |
| chr7:6,486,067    | rs7797644   | C | 1.04 | 0.767 | 0.75  | -0.016 | 5.84E-18 | DAGLB, RAC1, FAM220A, KDELRL2         |
| chr7:45,077,978   | rs2107732   | G | 1.06 | 0.91  | 0.897 | -0.013 | 3.66E-26 | CCM2, MYO1G                           |
| chr7:107,244,545  | rs10953541  | C | 1.08 | 0.75  | 0.756 | 0.006  | 1.77E-01 | BCAP29, GPR22                         |
| chr7:129,663,496  | rs11556924  | C | 1.09 | 0.615 | 0.605 | -0.01  | 4.21E-05 | ZC3HC1, KLHDC10                       |
| chr7:139,757,136  | rs10237377  | G | 1.05 | 0.659 | 0.675 | 0.016  | 8.27E-14 | PARP12, TBXAS1                        |
| chr8:19,813,180   | rs264       | G | 1.11 | 0.859 | 0.86  | 0.002  | 1.00E+00 | LPL                                   |
| chr8:106,565,414  | rs10093110  | G | 1.03 | 0.592 | 0.584 | -0.008 | 1.82E-02 | ZFPM2                                 |
| chr8:126,490,972  | rs2954029   | A | 1.06 | 0.539 | 0.531 | -0.007 | 6.77E-02 | TRIB1                                 |
| chr10:44,775,824  | rs1746048   | C | 1.09 | 0.868 | 0.868 | 0      | 1.00E+00 | CXCL12                                |
| chr10:82,251,514  | rs17680741  | T | 1.05 | 0.713 | 0.724 | 0.011  | 7.86E-07 | TSPAN14, MAT1A, FAM213A               |
| chr10:104,719,096 | rs12413409  | G | 1.12 | 0.923 | 0.923 | 0      | 1.00E+00 | CYP17A1, CNNM2, NT5C2                 |
| chr11:9,751,196   | rs10840293  | A | 1.06 | 0.56  | 0.555 | -0.005 | 1.00E+00 | SWAP70                                |
| chr11:10,745,394  | rs11042937  | T | 1.03 | 0.503 | 0.502 | -0.002 | 1.00E+00 | MRV11, CTR9                           |
| chr11:13,301,548  | rs1351525   | T | 1.05 | 0.708 | 0.701 | -0.007 | 5.35E-02 | ARNTL                                 |
| chr11:65,391,317  | rs12801636  | G | 1.05 | 0.777 | 0.769 | -0.007 | 3.52E-03 | PCNX3, POLA2, RELA, SIPA1, and others |
| chr12:7,175,872   | rs11838267  | T | 1.05 | 0.866 | 0.861 | -0.004 | 3.57E-01 | C1S                                   |
| chr12:20,220,033  | rs10841443  | G | 1.06 | 0.668 | 0.668 | 0      | 1.00E+00 | RP11-664H17.1                         |
| chr12:95,355,541  | rs7306455   | G | 1.05 | 0.9   | 0.902 | 0.002  | 1.00E+00 | NDUFA12, FGD6                         |
| chr12:124,427,306 | rs11057401  | T | 1.08 | 0.687 | 0.693 | 0.005  | 7.16E-01 | CCDC92                                |
| chr13:33,058,333  | rs9591012   | G | 1.04 | 0.637 | 0.643 | 0.005  | 1.00E+00 | N4BP2L2, PDS5B                        |
| chr14:94,838,142  | rs112635299 | G | 1.13 | 0.979 | 0.982 | 0.002  | 5.03E-03 | SERPINA2, SERPINA1                    |
| chr15:65,024,204  | rs6494488   | A | 1.05 | 0.852 | 0.859 | 0.007  | 6.04E-04 | OAZ2, RBPMS2, TRIP4, and others       |
| chr15:67,455,630  | rs56062135  | C | 1.07 | 0.764 | 0.775 | 0.01   | 6.31E-07 | SMAD3                                 |
| chr15:79,089,111  | rs3825807   | A | 1.08 | 0.555 | 0.545 | -0.01  | 5.71E-04 | ADAMTS7                               |
| chr15:89,574,218  | rs8042271   | G | 1.1  | 0.961 | 0.968 | 0.007  | 7.58E-15 | MFGES, RP11-326A19.4, ABHD2           |
| chr15:96,146,414  | rs17581137  | A | 1.04 | 0.75  | 0.748 | -0.002 | 1.00E+00 | gene desert                           |
| chr16:56,961,074  | rs1800775   | C | 1.03 | 0.512 | 0.51  | -0.003 | 1.00E+00 | CETP                                  |
| chr16:75,387,533  | rs3851738   | C | 1.07 | 0.593 | 0.605 | 0.011  | 4.79E-06 | CFDP1, BCAR1                          |
| chr16:83,045,790  | rs7500448   | A | 1.07 | 0.75  | 0.756 | 0.005  | 4.79E-01 | CDH13                                 |
| chr17:17,543,722  | rs12936587  | G | 1.07 | 0.529 | 0.533 | 0.004  | 1.00E+00 | Ra11, PEMT, RASD1, SMCR3, TOM1L2      |
| chr17:46,988,597  | rs46522     | T | 1.06 | 0.529 | 0.516 | -0.013 | 4.45E-08 | UBE2Z, GIP, ATP5G1                    |
| chr17:62,387,091  | rs1867624   | T | 1.04 | 0.616 | 0.614 | -0.003 | 1.00E+00 | PECAM1, DDX5, TEX2                    |
| chr19:8,429,323   | rs116843064 | G | 1.14 | 0.981 | 0.978 | -0.003 | 2.63E-04 | ANGTPL4                               |

|                  |            |   |      |       |       |        |          |                                                 |
|------------------|------------|---|------|-------|-------|--------|----------|-------------------------------------------------|
| chr19:11,163,601 | rs1122608  | G | 1.14 | 0.746 | 0.75  | 0.004  | 1.00E+00 | LDLR, SMARCA4                                   |
| chr19:32,882,020 | rs12976411 | A | 1.33 | 0.961 | 0.956 | -0.005 | 6.34E-08 | ZNF507, LOC400684                               |
| chr19:46,190,268 | rs1964272  | G | 1.04 | 0.518 | 0.52  | 0.002  | 1.00E+00 | SNRPD2, GIPR                                    |
| chr20:33,764,554 | rs867186   | A | 1.07 | 0.911 | 0.92  | 0.009  | 3.00E-12 | PROCR, ASIP, NCOA6, ITGB4BP/EIF6 and others     |
| chr22:24,262,640 | rs180803   | G | 1.2  | 0.988 | 0.991 | 0.004  | 3.83E-13 | ADORA2A                                         |
| chr1:2,252,205   | rs36096196 | T | 1.05 | 0.147 | 0.144 | -0.004 | 1.00E+00 | MORN1, SKI                                      |
| chr1:3,325,912   | rs2493298  | A | 1.06 | 0.139 | 0.13  | -0.009 | 3.45E-08 | PRDM16, PEX10, PLCH2, RER1                      |
| chr1:154,422,067 | rs4845625  | T | 1.06 | 0.422 | 0.429 | 0.007  | 8.48E-02 | IL6R, AQP10, ATP8B2, CHTOP, UBAP2L              |
| chr1:169,094,459 | rs1892094  | C | 1.04 | 0.478 | 0.46  | -0.018 | 2.70E-16 | ATP1B1, BLZF1, CCDC181, F5, NME7, SELP, SLC19A2 |
| chr1:201,872,264 | rs2820315  | T | 1.05 | 0.316 | 0.33  | 0.013  | 7.42E-10 | LMOD1, IPO9, NAV1, SHISA4, TIMM17A              |
| chr1:210,468,999 | rs60154123 | T | 1.05 | 0.156 | 0.157 | 0.001  | 1.00E+00 | HHAT, SERTAD4, DIEXF                            |
| chr1:230,845,794 | rs699      | G | 1.04 | 0.405 | 0.411 | 0.006  | 7.44E-01 | AGT, CAPN9, GNPAT                               |
| chr2:44,073,881  | rs6544713  | T | 1.06 | 0.32  | 0.34  | 0.02   | 1.59E-23 | ABCG5, ABCG8                                    |
| chr2:85,809,989  | rs1561198  | T | 1.06 | 0.463 | 0.47  | 0.007  | 2.06E-01 | VAMP5, VAMP8, GGCX                              |
| chr2:145,801,461 | rs2252641  | C | 1.06 | 0.45  | 0.45  | 0      | 1.00E+00 | ZEB2, TEX41                                     |
| chr2:203,745,885 | rs6725887  | C | 1.14 | 0.127 | 0.123 | -0.004 | 5.33E-01 | WDR12, CARF, FAM117B, ICA1L, NBEAL1             |
| chr2:216,304,384 | rs1250229  | T | 1.07 | 0.262 | 0.257 | -0.006 | 3.70E-01 | FN1, ATIC, LOC102724849, ABCA12, LINC00607      |
| chr2:218,683,154 | rs2571445  | A | 1.04 | 0.393 | 0.404 | 0.011  | 1.17E-05 | TNS1, CXCR2, RUFY4                              |
| chr2:233,633,460 | rs1801251  | A | 1.05 | 0.362 | 0.383 | 0.021  | 2.36E-24 | KCNJ13, GIGYF2                                  |
| chr3:14,928,077  | rs748431   | G | 1.04 | 0.364 | 0.366 | 0.002  | 1.00E+00 | FGD5                                            |
| chr3:46,688,562  | rs7633770  | A | 1.03 | 0.423 | 0.437 | 0.014  | 2.15E-09 | ALS2CL, RTP3                                    |
| chr3:124,475,201 | rs62265630 | G | 1.08 | 0.144 | 0.148 | 0.003  | 1.00E+00 | UMPS, ITGB5                                     |
| chr3:138,119,952 | rs2306374  | C | 1.12 | 0.161 | 0.164 | 0.003  | 1.00E+00 | MRAS, CEP70                                     |
| chr3:172,115,902 | rs12897    | G | 1.04 | 0.373 | 0.356 | -0.017 | 6.44E-15 | FNDC3B                                          |
| chr4:3,449,652   | rs16844401 | A | 1.07 | 0.066 | 0.059 | -0.007 | 3.96E-09 | HGFAC, RGS12, MSANTD1                           |
| chr4:57,838,583  | rs17087335 | T | 1.06 | 0.187 | 0.186 | -0.001 | 1.00E+00 | REST, NOA1                                      |
| chr4:77,416,627  | rs12500824 | A | 1.04 | 0.353 | 0.364 | 0.011  | 8.36E-06 | SHROOM3, SEPT11, FAM47E, STBD1                  |
| chr4:120,901,336 | rs11723436 | G | 1.05 | 0.313 | 0.312 | -0.001 | 1.00E+00 | MAD2L1, PDE5A                                   |
| chr4:147,472,512 | rs1878406  | T | 1.1  | 0.142 | 0.138 | -0.004 | 7.02E-01 | EDNRA                                           |
| chr5:55,860,781  | rs3936511  | G | 1.04 | 0.191 | 0.198 | 0.007  | 1.42E-03 | MAP3K1, MIER3                                   |
| chr5:121,413,208 | rs1800449  | T | 1.09 | 0.169 | 0.18  | 0.011  | 8.47E-11 | LOX                                             |
| chr5:131,667,353 | rs273909   | G | 1.07 | 0.116 | 0.113 | -0.003 | 1.00E+00 | SLC22A4                                         |
| chr5:131,867,702 | rs2706399  | G | 1.07 | 0.506 | 0.519 | 0.013  | 2.47E-08 | IL5, RAD50                                      |
| chr5:142,516,897 | rs246600   | T | 1.05 | 0.471 | 0.473 | 0.002  | 1.00E+00 | ARHGAP26                                        |
| chr6:36,638,636  | rs1321309  | A | 1.03 | 0.502 | 0.513 | 0.011  | 1.99E-05 | CDKN1A, P116                                    |
| chr6:126,717,064 | rs1591805  | A | 1.04 | 0.504 | 0.512 | 0.009  | 5.66E-03 | CENPW                                           |
| chr6:160,961,137 | rs3798220  | C | 1.51 | 0.018 | 0.018 | 0      | 1.00E+00 | LPA, SLC22A3, LPAL2                             |
| chr7:12,261,911  | rs11509880 | A | 1.04 | 0.332 | 0.332 | 0      | 1.00E+00 | TMEM106B, THSD7A                                |
| chr7:19,036,775  | rs2023938  | C | 1.08 | 0.099 | 0.099 | -0.001 | 1.00E+00 | HDAC9                                           |
| chr7:117,332,914 | rs975722   | G | 1.03 | 0.386 | 0.376 | -0.01  | 1.11E-04 | CTTNBP2, CFTR, ASZ1                             |
| chr7:150,690,176 | rs3918226  | T | 1.14 | 0.077 | 0.075 | -0.002 | 1.00E+00 | NOS3                                            |
| chr8:18,286,997  | rs6997340  | T | 1.04 | 0.28  | 0.279 | -0.001 | 1.00E+00 | NAT2                                            |

|                   |             |           |      |       |       |        |          |                                                       |
|-------------------|-------------|-----------|------|-------|-------|--------|----------|-------------------------------------------------------|
| chr9:110,517,794  | rs944172    | C         | 1.04 | 0.281 | 0.293 | 0.012  | 4.83E-09 | KLF4                                                  |
| chr9:113,169,775  | rs111245230 | C         | 1.14 | 0.035 | 0.034 | -0.001 | 1.00E+00 | SVEP1                                                 |
| chr9:124,420,173  | rs885150    | C         | 1.03 | 0.26  | 0.245 | -0.016 | 6.33E-16 | DAB2IP                                                |
| chr9:136,154,168  | rs579459    | C         | 1.1  | 0.21  | 0.176 | -0.033 | 9.87E-86 | ABO, SURF6, GBGT1                                     |
| chr10:12,303,813  | rs61848342  | C         | 1.04 | 0.369 | 0.369 | 0      | 1.00E+00 | CDC123, NUDT5, OPTN                                   |
| chr10:30,335,122  | rs2505083   | C         | 1.07 | 0.429 | 0.425 | -0.004 | 1.00E+00 | KIAA1462                                              |
| chr10:91,002,927  | rs1412444   | T         | 1.09 | 0.337 | 0.357 | 0.02   | 4.45E-22 | LIPA                                                  |
| chr10:105,693,644 | rs4918072   | A         | 1.04 | 0.268 | 0.269 | 0      | 1.00E+00 | STN1, SH3PXD2A                                        |
| chr10:124,237,612 | rs4752700   | G         | 1.03 | 0.435 | 0.421 | -0.014 | 1.19E-09 | HTRA1, PLEKHA1                                        |
| chr11:5,701,074   | rs11601507  | A         | 1.09 | 0.068 | 0.075 | 0.007  | 9.27E-09 | TRIM5, TRIM22, TRIM6, OR52N1, OR52B6                  |
| chr11:43,696,917  | rs7116641   | G         | 1.03 | 0.316 | 0.314 | -0.003 | 1.00E+00 | HSD17B12                                              |
| chr11:75,274,150  | rs590121    | T         | 1.05 | 0.289 | 0.3   | 0.011  | 1.20E-06 | SERPINH1                                              |
| chr11:100,624,599 | rs7947761   | G         | 1.04 | 0.292 | 0.314 | 0.022  | 7.39E-29 | ARHGAP42                                              |
| chr11:103,660,567 | rs974819    | T         | 1.07 | 0.291 | 0.298 | 0.007  | 1.47E-02 | PDGFD                                                 |
| chr12:57,527,283  | rs11172113  | C         | 1.06 | 0.411 | 0.421 | 0.01   | 4.20E-04 | LRP1, STAT6                                           |
| chr12:111,884,608 | rs3184504   | T         | 1.07 | 0.478 | 0.495 | 0.017  | 4.80E-14 | SH2B3, FLJ21127, ATXN2, and others                    |
| chr12:118,265,441 | rs11830157  | G         | 1.12 | 0.401 | 0.377 | -0.024 | 1.11E-29 | KSR2                                                  |
| chr12:121,416,988 | rs2244608   | G         | 1.06 | 0.317 | 0.313 | -0.004 | 1.00E+00 | HNFI1A, OASL, C12orf43, and others                    |
| chr12:125,307,053 | rs11057830  | A         | 1.07 | 0.138 | 0.134 | -0.005 | 1.76E-01 | SCARB1                                                |
| chr13:28,973,621  | rs9319428   | A         | 1.06 | 0.296 | 0.287 | -0.009 | 3.48E-04 | FLT1                                                  |
| chr13:110,960,712 | rs4773144   | G         | 1.07 | 0.433 | 0.428 | -0.005 | 1.00E+00 | COL4A1, COL4A2                                        |
| chr13:113,631,780 | rs1317507   | A         | 1.04 | 0.256 | 0.248 | -0.008 | 6.45E-04 | MCF2L, PCID2, CUL4A                                   |
| chr14:58,794,001  | rs2145598   | G         | 1.03 | 0.425 | 0.415 | -0.01  | 1.80E-04 | ARID4A, PSMA3                                         |
| chr14:75,147,552  | rs3832966   | ACCC<br>G | 1.05 | 0.473 | 0.478 | 0.005  | 1.00E+00 | TMED10, ZC2HC1C, RPS6KL1, NEK9, EIF2B2e, ACYP1        |
| chr14:100,133,942 | rs2895811   | C         | 1.07 | 0.42  | 0.42  | 0      | 1.00E+00 | HHIPL1, YY1                                           |
| chr15:91,416,550  | rs17514846  | A         | 1.07 | 0.471 | 0.475 | 0.004  | 1.00E+00 | FURIN, FES                                            |
| chr16:72,096,666  | rs1050362   | A         | 1.04 | 0.352 | 0.342 | -0.01  | 5.26E-05 | DHX38, HP, DHODH                                      |
| chr16:81,906,423  | rs7199941   | A         | 1.04 | 0.392 | 0.394 | 0.001  | 1.00E+00 | PLCG2, CENPN                                          |
| chr17:27,941,886  | rs13723     | G         | 1.04 | 0.493 | 0.503 | 0.01   | 3.16E-04 | CORO6, BLMH, ANKRD13B, GIT1, SSH2, EFCAB5             |
| chr17:30,033,514  | rs76954792  | T         | 1.04 | 0.224 | 0.232 | 0.008  | 1.82E-03 | COPRS, RAB11FIP4                                      |
| chr17:40,257,163  | rs2074158   | C         | 1.05 | 0.175 | 0.168 | -0.007 | 3.47E-03 | DHX58, KAT2A, RAB5, NKIRAS2, DNAJC7, KCN4, HCRT, GHDC |
| chr17:45,013,271  | rs17608766  | C         | 1.07 | 0.145 | 0.15  | 0.004  | 4.53E-01 | GOSR2, MYL4, ARL17A, and others                       |
| chr17:59,013,488  | rs7212798   | C         | 1.08 | 0.152 | 0.143 | -0.009 | 5.12E-08 | BCAS3                                                 |
| chr18:47,229,717  | rs9964304   | C         | 1.04 | 0.269 | 0.264 | -0.005 | 7.93E-01 | ACAA2, RPL17                                          |
| chr18:57,838,401  | rs663129    | A         | 1.06 | 0.235 | 0.225 | -0.01  | 6.70E-07 | PMAIP1, MC4R                                          |
| chr19:45,395,619  | rs2075650   | G         | 1.14 | 0.146 | 0.153 | 0.007  | 1.63E-04 | APOE, APOC1, TOMM40, PVRL2, COTL1                     |
| chr20:39,924,279  | rs6102343   | A         | 1.04 | 0.236 | 0.235 | -0.002 | 1.00E+00 | ZHX3, PLCG1, TOP1                                     |
| chr20:44,586,023  | rs3827066   | T         | 1.04 | 0.147 | 0.143 | -0.004 | 1.00E+00 | PCIF1, ZNF335, NEURL2, PLTP                           |
| chr20:44,607,661  | rs7270354   | A         | 1.06 | 0.147 | 0.143 | -0.004 | 1.00E+00 | MMP9                                                  |
| chr20:57,714,025  | rs260020    | T         | 1.04 | 0.125 | 0.114 | -0.011 | 3.30E-13 | ZNF831                                                |
| chr21:30,533,076  | rs2832227   | G         | 1.04 | 0.162 | 0.148 | -0.014 | 3.27E-18 | MAP3K7CL, BACH1                                       |
| chr21:35,599,128  | rs9982601   | T         | 1.18 | 0.131 | 0.131 | 0      | 1.00E+00 | MRPS6, SLC5A3, KCNE2                                  |

|                   |            |   |      |       |       |        |          |                                          |
|-------------------|------------|---|------|-------|-------|--------|----------|------------------------------------------|
| chr3:156,852,592  | rs4266144  | G | 1.03 | 0.301 | 0.286 | -0.014 | 1.61E-11 | CCNL1, TIPARP                            |
| chr4:81,181,072   | rs10857147 | T | 1.06 | 0.288 | 0.279 | -0.009 | 2.46E-04 | PRDM8, FGF5                              |
| chr4:96,117,371   | rs3775058  | A | 1.04 | 0.211 | 0.222 | 0.011  | 2.52E-08 | UNC5C                                    |
| chr8:22,033,615   | rs6984210  | G | 1.08 | 0.054 | 0.057 | 0.003  | 3.81E-01 | BMP1, SFTPC, DMTN, PHYHIP,<br>DOK2, XPO7 |
| chr9:22,125,503   | rs1333049  | C | 1.29 | 0.479 | 0.496 | 0.017  | 2.50E-14 | ANRIL, CDKN2B-AS                         |
| chr11:116,648,917 | rs964184   | G | 1.13 | 0.135 | 0.123 | -0.011 | 7.66E-14 | APOA1-C3-A4-A5                           |
| chr12:54,513,915  | rs11170820 | G | 1.1  | 0.057 | 0.058 | 0.001  | 1.00E+00 | HOXC4                                    |
| chr17:2,126,504   | rs216172   | C | 1.07 | 0.352 | 0.338 | -0.014 | 7.92E-11 | SMG6, SRR                                |
| chr19:17,855,763  | rs73015714 | G | 1.06 | 0.209 | 0.202 | -0.006 | 5.17E-02 | FCHO1, COLGALT1                          |
| chr19:41,854,534  | rs8108632  | T | 1.05 | 0.411 | 0.404 | -0.007 | 1.92E-01 | HNRNPUL1, CCDC97, TGFB1,<br>B9D2         |

RAF, risk allele frequency  
P-value was adjusted by Bonferroni correction.



**Supplementary Table 8** Characteristics of individuals aged 39-74 in two sub-cohorts from UK Biobank for calculating QRISK3 score

|                                                    | England             |                  | Scotland          |                 |
|----------------------------------------------------|---------------------|------------------|-------------------|-----------------|
|                                                    | Women<br>(N=108024) | Men<br>(N=79881) | Women<br>(N=6959) | Men<br>(N=4914) |
| <b>Age (years)</b>                                 |                     |                  |                   |                 |
| Mean (SD)                                          | 57 (± 7.9)          | 58 (± 7.8)       | 57 (± 7.8)        | 58 (± 7.9)      |
| <b>Townsend deprivation scores</b>                 |                     |                  |                   |                 |
| Mean (SD)                                          | -1.7 (± 2.8)        | -1.7 (± 2.9)     | -1.2 (± 3.2)      | -1.3 (± 3.4)    |
| <b>BMI</b>                                         |                     |                  |                   |                 |
| Mean (SD)                                          | 27 (± 5.2)          | 28 (± 4.3)       | 27 (± 5.2)        | 28 (± 4.2)      |
| <b>Cholesterol/HDL ratio</b>                       |                     |                  |                   |                 |
| Mean (SD)                                          | 3.8 (± 1.0)         | 4.4 (± 1.1)      | 3.8 (± 1.0)       | 4.4 (± 1.1)     |
| <b>Systolic blood pressure (mmHg)</b>              |                     |                  |                   |                 |
| Mean (SD)                                          | 140 (± 19)          | 140 (± 17)       | 140 (± 19)        | 140 (± 18)      |
| <b>Ethnicity</b>                                   |                     |                  |                   |                 |
| White or not stated                                | 106585 (98.67 %)    | 79154 (99.09 %)  | 6936 (99.67 %)    | 4900 (99.72 %)  |
| Indian                                             | 137 (0.13 %)        | 93 (0.12 %)      | 2 (0.03 %)        | 1 (0.02 %)      |
| Pakistani                                          | 42 (0.04 %)         | 36 (0.05 %)      | 3 (0.04 %)        | 1 (0.02 %)      |
| Bangladeshi                                        | 2 (0.00 %)          | 1 (0.00 %)       | 0 (0.00 %)        | 0 (0.00 %)      |
| Other Asian                                        | 19 (0.02 %)         | 16 (0.02 %)      | 0 (0.00 %)        | 0 (0.00 %)      |
| Black Caribbean                                    | 467 (0.43 %)        | 182 (0.23 %)     | 1 (0.01 %)        | 0 (0.00 %)      |
| Black African                                      | 77 (0.07 %)         | 37 (0.05 %)      | 0 (0.00 %)        | 0 (0.00 %)      |
| Chinese                                            | 25 (0.02 %)         | 21 (0.03 %)      | 0 (0.00 %)        | 0 (0.00 %)      |
| Other ethnic group                                 | 670 (0.62 %)        | 341 (0.43 %)     | 17 (0.24 %)       | 12 (0.24 %)     |
| <b>Smoke status</b>                                |                     |                  |                   |                 |
| non-smoker                                         | 68319 (63.24 %)     | 40730 (50.99 %)  | 4335 (62.29 %)    | 2639 (53.70 %)  |
| ex-smoker                                          | 38788 (35.91 %)     | 38170 (47.78 %)  | 2555 (36.72 %)    | 2200 (44.77 %)  |
| light smoker (less than 10)                        | 267 (0.25 %)        | 172 (0.22 %)     | 19 (0.27 %)       | 14 (0.28 %)     |
| moderate smoker (10 to 19)                         | 362 (0.34 %)        | 390 (0.49 %)     | 21 (0.30 %)       | 23 (0.47 %)     |
| heavy smoker (20 or over)                          | 288 (0.27 %)        | 419 (0.52 %)     | 29 (0.42 %)       | 38 (0.77 %)     |
| <b>Positive family history of CVD</b>              |                     |                  |                   |                 |
| Yes                                                | 14776 (13.68 %)     | 10736 (13.44 %)  | 1019 (14.64 %)    | 713 (14.51 %)   |
| No                                                 | 93248 (86.32 %)     | 69145 (86.56 %)  | 5940 (85.36 %)    | 4201 (85.49 %)  |
| <b>Type 1 diabetes</b>                             |                     |                  |                   |                 |
| Yes                                                | 789 (0.73 %)        | 1061 (1.33 %)    | 36 (0.52 %)       | 52 (1.06 %)     |
| No                                                 | 107235 (99.27 %)    | 78820 (98.67 %)  | 6923 (99.48 %)    | 4862 (98.94 %)  |
| <b>Type 2 diabetes</b>                             |                     |                  |                   |                 |
| Yes                                                | 5135 (4.75 %)       | 7790 (9.75 %)    | 280 (4.02 %)      | 396 (8.06 %)    |
| No                                                 | 102889 (95.25 %)    | 72091 (90.25 %)  | 6679 (95.98 %)    | 4518 (91.94 %)  |
| <b>Treated hypertension</b>                        |                     |                  |                   |                 |
| Yes                                                | 13624 (12.61 %)     | 13633 (17.07 %)  | 812 (11.67 %)     | 809 (16.46 %)   |
| No                                                 | 94400 (87.39 %)     | 66248 (82.93 %)  | 6147 (88.33 %)    | 4105 (83.54 %)  |
| <b>Rheumatoid arthritis</b>                        |                     |                  |                   |                 |
| Yes                                                | 326 (0.30 %)        | 105 (0.13 %)     | 21 (0.30 %)       | 3 (0.06 %)      |
| No                                                 | 107698 (99.70 %)    | 79776 (99.87 %)  | 6938 (99.70 %)    | 4911 (99.94 %)  |
| <b>Atrial fibrillation</b>                         |                     |                  |                   |                 |
| Yes                                                | 3535 (3.27 %)       | 6698 (8.38 %)    | 217 (3.12 %)      | 345 (7.02 %)    |
| No                                                 | 104489 (96.73 %)    | 73183 (91.62 %)  | 6742 (96.88 %)    | 4569 (92.98 %)  |
| <b>Chronic kidney disease (stage 3, 4, or 5)</b>   |                     |                  |                   |                 |
| Yes                                                | 1199 (1.11 %)       | 1118 (1.40 %)    | 46 (0.66 %)       | 41 (0.83 %)     |
| No                                                 | 106825 (98.89 %)    | 78763 (98.60 %)  | 6913 (99.34 %)    | 4873 (99.17 %)  |
| <b>Migraine</b>                                    |                     |                  |                   |                 |
| Yes                                                | 1553 (1.44 %)       | 441 (0.55 %)     | 65 (0.93 %)       | 21 (0.43 %)     |
| No                                                 | 106471 (98.56 %)    | 79440 (99.45 %)  | 6894 (99.07 %)    | 4893 (99.57 %)  |
| <b>Corticosteroid use</b>                          |                     |                  |                   |                 |
| Yes                                                | 2971 (2.75 %)       | 2581 (3.23 %)    | 181 (2.60 %)      | 160 (3.26 %)    |
| No                                                 | 105053 (97.25 %)    | 77300 (96.77 %)  | 6778 (97.40 %)    | 4754 (96.74 %)  |
| <b>Systemic lupus erythematosus</b>                |                     |                  |                   |                 |
| Yes                                                | 208 (0.19 %)        | 20 (0.03 %)      | 10 (0.14 %)       | 4 (0.08 %)      |
| No                                                 | 107816 (99.81 %)    | 79861 (99.97 %)  | 6949 (99.86 %)    | 4910 (99.92 %)  |
| <b>Atypical antipsychotic use</b>                  |                     |                  |                   |                 |
| Yes                                                | 51 (0.05 %)         | 73 (0.09 %)      | 4 (0.06 %)        | 6 (0.12 %)      |
| No                                                 | 107973 (99.95 %)    | 79808 (99.91 %)  | 6955 (99.94 %)    | 4908 (99.88 %)  |
| <b>Severe mental illness</b>                       |                     |                  |                   |                 |
| Yes                                                | 5716 (5.29 %)       | 3079 (3.85 %)    | 178 (2.56 %)      | 107 (2.18 %)    |
| No                                                 | 102308 (94.71 %)    | 76802 (96.15 %)  | 6781 (97.44 %)    | 4807 (97.82 %)  |
| <b>Erectile dysfunction diagnosis or treatment</b> |                     |                  |                   |                 |
| Yes                                                | 0 (0.00 %)          | 277 (0.35 %)     | 0 (0.00 %)        | 13 (0.26 %)     |
| No                                                 | 108024 (100.00 %)   | 79604 (99.65 %)  | 6959 (100.00 %)   | 4901 (99.74 %)  |

**Supplementary Table 9** Statistics for the Framingham score, QRISK3 score and genetic risk score in populations

|                                       | England<br>(N=317,889)  | Scotland<br>(N=319,63) | P-value |
|---------------------------------------|-------------------------|------------------------|---------|
| <b>Framingham score using BMI**</b>   |                         |                        | 0.0077  |
| Mean (SD)                             | 17.4 (13.5)             | 17.6 (13.7)            |         |
| Median [Min, Max]                     | 13.4 [0.8, 99.4]        | 13.6 [1.0, 96.5]       |         |
|                                       | England<br>(N= 187,905) | Scotland<br>(N=11,873) | P-value |
| <b>QRISK3 score*</b>                  |                         |                        | 0.0122  |
| Mean (SD)                             | 10.6 (9.3)              | 10.4 (9.0)             |         |
| Median [Min, Max]                     | 8.3 [0.3, 99.9]         | 8.0 [0.3, 92.6]        |         |
|                                       | England<br>(N=289,039)  | Scotland<br>(N=29,344) | P-value |
| <b>wGRS (6.6 million variants)***</b> |                         |                        | < 0.001 |
| Mean (SD)                             | -1.1 (0.0)              | -1.1 (0.0)             |         |
| Median [Min, Max]                     | -1.1 [-1.3, -0.9]       | -1.1 [-1.3, -0.9]      |         |

*SD: standard deviation*

\*  $p < 0.05$ ; \*\*  $p < 0.01$ ; \*\*\*  $p < 0.001$ ;

**Supplementary Table 10** Script written for calculating the Framingham risk score using lipids and BMI

```
# calculating the Framingham risk score using lipids
frisk_lipid_calc <- function(gender, Age, HDL_cholesterol, Total_cholesterol,
                             Systolic_blood_pressure, is_sbp_under_treatment, Cigarette_smoker,
                             Diabetes_present){
  if(gender=="M" || gender=="m"){
    if(is_sbp_under_treatment==1){
      Risk_Factors = (log(Age) * 3.06117) + (log(Total_cholesterol) * 1.12370) -
(log(HDL_cholesterol) * 0.93263) +
      (log(Systolic_blood_pressure) * 1.99881) + Cigarette_smoker*0.65451 +
      Diabetes_present*0.57367 - 23.9802
      Risk=100 * (1 - 0.88936^exp(Risk_Factors))
    }else{
      Risk_Factors = (log(Age) * 3.06117) + (log(Total_cholesterol) * 1.12370) -
(log(HDL_cholesterol) * 0.93263) +
      (log(Systolic_blood_pressure) * 1.93303) + Cigarette_smoker*0.65451 +
      Diabetes_present*0.57367 - 23.9802
      Risk=100 * (1 - 0.88936^exp(Risk_Factors))
    }
  }else{
    if(is_sbp_under_treatment==1){
      Risk_Factors = (log(Age) * 2.32888) + (log(Total_cholesterol) * 1.20904) -
(log(HDL_cholesterol) * 0.70833) +
      (log(Systolic_blood_pressure) * 2.82263) + Cigarette_smoker*0.52873 +
      Diabetes_present*0.69154 - 26.1931
      Risk=100 * (1 - 0.95012^exp(Risk_Factors))
    }else{
      Risk_Factors = (log(Age) * 2.32888) + (log(Total_cholesterol) * 1.20904) -
(log(HDL_cholesterol) * 0.70833) +
      (log(Systolic_blood_pressure) * 2.76157) + Cigarette_smoker*0.52873 +
      Diabetes_present*0.69154 - 26.1931
      Risk=100 * (1 - 0.95012^exp(Risk_Factors))
    }
  }
  }
  return(Risk)
}
```

```

# calculating the Framingham risk score using BMI
frisk_bmi_calc <- function(gender, Age, bmi,
                          Systolic_blood_pressure, is_sbp_under_treatment, Cigarette_smoker,
                          Diabetes_present){
  if(gender=="M" || gender=="m"){
    if(is_sbp_under_treatment==1){
      Risk_Factors = (log(Age) * 3.11296) + (log(bmi) * 0.79277) +
        (log(Systolic_blood_pressure) * 1.92672) + Cigarette_smoker*0.70953 +
        Diabetes_present*0.53160 - 23.9388
      Risk=100 * (1 - 0.88431^exp(Risk_Factors))
    }else{
      Risk_Factors = (log(Age) * 3.11296) + (log(bmi) * 0.79277) +
        (log(Systolic_blood_pressure) * 1.85508) + Cigarette_smoker*0.70953 +
        Diabetes_present*0.53160 - 23.9388
      Risk=100 * (1 - 0.88431^exp(Risk_Factors))
    }
  }else{
    if(is_sbp_under_treatment==1){
      Risk_Factors = (log(Age) * 2.72107) + (log(bmi) * 0.51125) +
        (log(Systolic_blood_pressure) * 2.88267) + Cigarette_smoker*0.61868 +
        Diabetes_present*0.77763 - 26.0145
      Risk=100 * (1 - 0.94833^exp(Risk_Factors))
    }else{
      Risk_Factors = (log(Age) * 2.72107) + (log(bmi) * 0.51125) +
        (log(Systolic_blood_pressure) * 2.81291) + Cigarette_smoker*0.61868 +
        Diabetes_present*0.77763 - 26.0145
      Risk=100 * (1 - 0.94833^exp(Risk_Factors))
    }
  }
  }
  return(Risk)
}

```
